# Supplementary material for: Integrative analysis of genome-wide loss of heterozygosity and monoallelic expression at nucleotide resolution reveals disrupted pathways in triple-negative breast cancer
Source: HighWire-hosted journal article supplement (doi:10.1101/gr.137570.112), 2012-05-25
Supplement: table_S2.xlsx [file table_S2.xlsx]

## Sheet: TN_SOLiD_HiSeq_coverage
Illumina HiSeq
Library	total.MB	total.mapped.MB	duplicates	total.mapped.MB.minusDuplicates	Approx. sequence coverage	paired.in.sequencing	read1	read2	properly.paired	with.itself.and.mate.mapped	singletons	with.mate.mapped.to.a.different.chr	with.mate.mapped.to.a.different.chr(mapQ>=5)
SA221	135649	130642	437322434	86909.9	29.1644	1356490504	678245252	678245252	1299734810	1301547098	4874834	795179	311236
SA221N	113852	108674	235815362	85092.7	28.5546	1138517846	569258923	569258923	1078710024	1080053544	6688485	506287	81927
SA232	141576	135647	534709926	82175.6	27.5757	1415760212	707880106	707880106	1347945414	1349602871	6862980	778130	287401
SA232N	138097	132055	396125097	92442.6	31.021	1380972452	690486226	690486226	1312006570	1313587714	6962943	625330	112996
SA238	106552	102932	165666349	86365.4	28.9817	1065518722	532759361	532759361	1022798936	1024005343	5314812	551481	196334
SA238N	118529	113480	146682928	98811.4	33.1582	1185286574	592643287	592643287	1127793334	1129027013	5769989	527359	98084
SA239	117555	113429	228278016	90601.2	30.4031	1175549814	587774907	587774907	1127519162	1128984780	5304999	648801	237557
SA239N	123080	117648	250294749	92618.2	31.0799	1230803382	615401691	615401691	1168790766	1170251904	6224824	545635	101194
SA299	83122.1	80384.3	326210751	47763.2	16.0279	831221238	415610619	415610619	800078520	800972941	2870070	351043	76952
SA299N	133990	128143	520109321	76132	25.5476	1339904440	669952220	669952220	1270091172	1271689580	9739528	592499	112684
SA300	129740	125119	438818376	81236.8	27.2607	1297399428	648699714	648699714	1244796864	1246040074	5145920	570986	136316
SA300N	134919	129047	596496131	69397	23.2876	1349193922	674596961	674596961	1283366852	1284809677	5656940	619246	130790
Median		121383		85729	28.7681
Life/ABI SOLiD
Library	total.reads	total.mapped.MB	duplicates	total.mapped.MB.minusDuplicates	Approx. sequence coverage	paired.in.sequencing	read1.MB	read2.MB	properly.paired	with.itself.and.mate.mapped	singletons	with.mate.mapped.to.a.different.chr	with.mate.mapped.to.a.different.chr(mapQ>=5)
SA028	3323326198	132245	643062137	77585.2	26.0353	3323326198	91120.4	52532.1	2412338830	2796946584	526379614	306859034	26970032
SA028N	3237797977	128740	678217957	71091.9	23.8563	3237797977	89541.9	50643.6	2352374452	2685436441	552361536	262888238	22270954
SA029	2750897116	111667	602847580	60424.8	20.2768	2750897116	87261.6	35198.3	1597674692	1863749008	887148108	218073306	25104634
SA029N	3405874686	136469	618862836	83865.3	28.1427	3405862304	91691.7	55021	2573647394	2928014695	477847609	276449382	21443950
SA030	4006142298	147328	1042836560	58686.5	19.6935	4006142298	115918	59072.7	2534485808	3064778821	941363477	419681210	42015098
SA030N	3491204304	130372	671930698	73257.9	24.5832	3491204304	101679	51017.1	2239796406	2705719754	785484550	371533170	34273174
SA052	3549573048	130196	796588384	62486.4	20.9686	3549572825	102136	52739.7	2273915468	2773840416	775732409	394267040	36627688
SA052N	3897456094	144518	866629245	70854.3	23.7766	3897456090	113047	57278.2	2499712644	3032343391	865112699	416229220	40721938
SA065	2896826140	117648	827370423	47321.5	15.8797	1592301724	45412.6	23941.7	1033450360	1263865408	328436316	182758404	16978360
SA065N	3121801479	113556	756549514	49249	16.5265	3121801479	90014.6	46252.8	1813451122	2420725686	701075793	506372806	80085192
SA073	3222428046	125781	763459371	60887.2	20.4319	2381168046	68998.2	35042.2	1539586928	1846552747	534615299	242109332	23861036
SA073N	3205810400	124455	632510672	70691.2	23.7219	2365016793	66599.5	36156	1599180882	1916582493	448434300	245192016	20915254
SA219	3097528011	122474	550921774	75645.5	25.3844	3097528011	86631.6	47771.3	2124846400	2529805170	567722841	336301292	44789582
SA219N	3424411012	137024	730245494	74952.8	25.1519	3424409439	94276.5	53860.7	2471413114	2866941667	557467772	310093912	29505370
SA220	2820947004	143692	609431370	91890.2	30.8356	2820946225	87896.7	37205.4	1591406402	1974139353	846806872	342764020	55264906
SA220N	3690411729	148608	857087523	75755.3	25.4212	3690411729	108018	53551.5	2409530258	2863032934	827378795	371172086	43878356
SA223	3155889062	155850	596755041	105126	35.277	3155889062	92087.2	45995.1	2167067330	2489157553	666731509	268464666	32374124
SA223N	3498669457	167074	742623124	103951	34.8829	3498669457	99127.6	53064.1	2456342540	2870362704	628306753	342665950	45311244
SA224	3225882571	156163	627896331	102792	34.4938	3225882571	94096	47038.7	2173006514	2517602738	708279833	285247978	33625250
SA224N	3542089961	141547	753251993	77520.8	26.0137	3542089961	101094	53207.7	2472437930	2865276848	676813113	317480832	30514788
SA225	3374572041	194032	803083730	125769	42.2045	3374572041	104207	45165.2	1981972316	2406622690	967949351	368923912	74797170
SA225N	3058655220	151225	710135018	90863.7	30.4912	3058655220	95862.2	39949.4	1838716246	2150366664	908288556	257561772	33163380
SA227	3723130605	147346	798510770	79472.8	26.6687	3723130605	110091	53245.8	2475745996	2873368997	849761608	330673760	42320414
SA227N	3168596281	160193	762632728	95368.9	32.003	3168596273	93511.7	45442.7	2089258854	2435404873	733191400	283128928	32845074
SA231	3545740085	140682	904275079	63819	21.4158	3545740085	107078	49146.5	2244798504	2614628193	931111892	313552330	50101562
SA231N	3901278657	154510	847893869	82439.3	27.6642	3901278657	114662	56281.3	2572321508	3011259889	890018768	359688134	41132844
SA233	2663998533	133789	560917597	86110.7	28.8962	2663998533	80262.9	37055.9	1711724816	1993565054	670433479	232947312	28451184
SA233N	4090240900	162264	974696480	79415.3	26.6494	4090206065	116977	61273.3	2696285838	3266535278	823670787	473445356	58684790
SA235	3185318612	157153	695864547	98004.8	32.8875	3185318612	95783.8	44437.5	2063421092	2391769909	793548703	272322384	30638378
SA235N	3730144742	147237	807641110	78587.9	26.3718	3730144663	107167	55538	2542012720	2975836840	754307823	344013318	35679462
SA236	3880390067	154093	849782636	81861.4	27.4703	3880390049	112423	57117.9	2645516504	3058018241	822371808	339154612	36439834
SA236N	3145983172	125261	595329216	74657.7	25.0529	3145983168	86043	49879.3	2317683732	2680123229	465859939	288847048	22098258
SA237	3455103496	137100	635624525	83072.4	27.8766	3455103496	94981.8	54441.3	2490434838	2883039478	572064018	315755828	24664778
SA237N	3417361481	135615	646484069	80663.6	27.0683	3417361437	92989.2	54515.2	2459947762	2878576906	538784531	323278306	27678002
Median		141115		78086.5	26.2035

## Sheet: TN_RNAseq_coverage
RNAseq Illumina GAII
Library	Total Reads	Mapped Reads
SA028	133720192	95056707
SA029	153083376	117344761
SA030	165768734	124343293
SA051	176536342	134240227
SA052	154672584	118142965
SA065	172547242	139848095
SA073	193648736	147220997
SA085	197848324	154243347
SA095	169422884	136731208
SA219	159762136	127987669
SA220	161006844	136645546
SA221	158166658	131543663
SA223	161230358	132871501
SA224	337805342	290216246
SA225	246804970	211100292
SA227	130219260	113524724
SA231	78584766	62234737
SA232	95774288	81220153
SA233	142838666	114242081
SA235	138385908	115125421
SA236	146279570	124650965
SA237	156945860	136380614
SA238	152439126	129519607
SA239	159864800	131794776
