# Supplementary material for: Integrative analysis of genome-wide loss of heterozygosity and monoallelic expression at nucleotide resolution reveals disrupted pathways in triple-negative breast cancer
Source: HighWire-hosted journal article supplement (doi:10.1101/gr.137570.112), 2012-05-25
Supplement: table_S3.xlsx [file table_S3.xlsx]

## Sheet: TAR_APOLLOH_OncoSNP
Samples	Number of LOH positions predicted by APOLLOH that have RNAseq coverage (>4 reads)	APOLLOH normal estimate	APOLLOH median RNAseq allelic ratio for LOH positions	APOLLOH RNAseq allelic ratio IQR for LOH positions	Number of LOH positions predicted by OncoSNP that have RNAseq coverage (>4 reads)	OncoSNP normal estimate	OncoSNP median RNAseq allelic ratio for LOH positions	OncoSNP RNAseq allelic ratio IQR for LOH positions	Wilcoxon one-tailed test (p-values)
SA028	4165	0.14	0.9706	0.1	4321	0.2	0.9643	0.125	6.24499e-05
SA029	7256	0.59	0.7778	0.20758	6282	0.7	0.7692	0.207011	0.000335828
SA030	7784	0.38	0.8333	0.28204	4473	0.5	0.8873	0.206897	1
SA052	10894	0.46	0.7143	0.233333	10912	0.6	0.6906	0.2	9.9052e-23
SA065	16796	0.18	0.9	0.2	18201	0.3	0.8919	0.2	4.90521e-06
SA073	6112	0.53	0.8	0.25641	3867	0.8	0.8333	0.260067	1
SA219	11587	0.5	0.8235	0.203989	10067	0.6	0.8333	0.203146	0.782082
SA220	2579	0.2	0.9286	0.166667	2445	0.3	0.9231	0.166667	0.103289
SA221	26856	0.55	0.8182	0.209091	3403	0.9	0.7551	0.220779	1.9811e-61
SA223	6938	0.35	0.8333	0.260714	6148	0.3	0.8333	0.244048	0.00876773
SA224	9463	0.21	0.9353	0.166667	9130	0.4	0.9333	0.166667	0.464711
SA225	9292	0.14	1	0.09375	9485	0.2	0.9945	0.111111	2.62267e-05
SA227	13564	0.3	0.8571	0.266667	8398	0.5	0.9167	0.193772	1
SA231	3933	0.13	0.9714	0.125	3691	0.2	0.9615	0.125	0.000290878
SA232	14587	0.55	0.8	0.22695	15143	0.7	0.8	0.222222	1.02661e-07
SA233	2445	0.59	0.8	0.28022	7436	0.8	0.7273	0.233333	1.21804e-31
SA235	15176	0.49	0.8	0.226779	598	0.8	0.75	0.388639	0.330448
SA236	14006	0.17	0.9333	0.166667	12855	0.4	0.9286	0.166667	0.0300844
SA237	8164	0.39	0.8333	0.256522	7451	0.5	0.8333	0.242308	0.0520532
SA238	4025	0.38	0.8484	0.252381	2902	0.6	0.8889	0.228621	0.999995
SA239	14448	0.56	0.8	0.222222	13622	0.7	0.8	0.222222	0.519524
SA299	10970	0.43	0.8095	0.206551	11128	0.7	0.8	0.22619	0.000595522
SA300	NA	0.31	NA	NA	NA	0.7	NA	NA	NA
