# Supplementary material for: Integrative analysis of genome-wide loss of heterozygosity and monoallelic expression at nucleotide resolution reveals disrupted pathways in triple-negative breast cancer
Source: HighWire-hosted journal article supplement (doi:10.1101/gr.137570.112), 2012-05-25
Supplement: table_S4.xlsx [file table_S4.xlsx]

## Sheet: A) Performance_LOH
APOLLOH								APOLLOH-noS								APOLLOH-noCN								SNVMix
Sample	Number_Posn	Pos_Predictions	SNP6_LOH_Predictions	Precision	Recall	F_Measure		Sample	Number_Posn	Pos_Predictions	SNP6_LOH_Predictions	Precision	Recall	F_Measure		Sample	Number_Posn	Pos_Predictions	SNP6_LOH_Predictions	Precision	Recall	F_Measure		Sample	Number_Posn	Pos_Predictions	SNP6_LOH_Predictions	Precision	Recall	F_Measure
SA028	180923	99181	93888	0.945151	0.998434	0.971062		SA028	180923	99179	93888	0.94517	0.998434	0.971072		SA028	180792	107959	93757	0.867385	0.998773	0.928454		SA028	180791	59884	93757	0.884427	0.564896	0.689438
SA029	188470	63001	61938	0.982842	0.999709	0.991204		SA029	188470	62980	61938	0.983169	0.999709	0.99137		SA029	188464	65635	61932	0.943308	0.999709	0.97069		SA029	188464	7205	61932	0.616794	0.0717561	0.128556
SA030	184014	48226	33081	0.681354	0.993289	0.80827		SA030	184014	62672	33081	0.518078	0.9815	0.678182		SA030	183992	65336	33081	0.502939	0.993319	0.667771		SA030	183992	9345	33081	0.530444	0.149844	0.233677
SA052	192383	56327	63456	0.959735	0.851913	0.902616		SA052	192383	52821	63456	0.977074	0.813319	0.887708		SA052	192383	65174	63456	0.785359	0.806622	0.795849		SA052	192383	5984	63456	0.631016	0.0595058	0.108756
SA065	124715	77934	77128	0.986848	0.997161	0.991977		SA065	124715	77477	77128	0.988771	0.993245	0.991003		SA065	124079	83616	76544	0.913868	0.998302	0.954221		SA065	124079	40220	76544	0.945997	0.497074	0.651708
SA073	192201	31282	21022	0.550253	0.818809	0.658191		SA073	192201	34207	21022	0.486538	0.791694	0.602691		SA073	192201	42915	21022	0.401724	0.820093	0.539281		SA073	192201	4104	21022	0.292885	0.0571782	0.0956778
SA219	194599	69553	72108	0.821676	0.792561	0.806856		SA219	194599	69265	72108	0.825612	0.79306	0.809009		SA219	194599	79651	72108	0.71527	0.790093	0.750822		SA219	194599	9903	72108	0.671211	0.0921812	0.1621
SA220	133634	17984	17496	0.945618	0.971994	0.958625		SA220	133634	17970	17496	0.944964	0.970565	0.957593		SA220	133628	41599	17490	0.410058	0.9753	0.577366		SA220	133628	21372	17490	0.485448	0.593196	0.533941
SA221	12320	1974	2723	0.864235	0.626515	0.726421		SA221	12320	1455	2723	0.833677	0.445465	0.580661		SA221	12320	2097	2723	0.839771	0.646713	0.730705		SA221	12320	49	2723	0.755102	0.013588	0.0266955
SA223	185834	49401	43893	0.855671	0.963046	0.906189		SA223	185834	48455	43893	0.872975	0.963707	0.9161		SA223	83914	26039	16889	0.64292	0.991237	0.779957		SA223	185826	29466	43885	0.775097	0.520428	0.622732
SA224	179762	78913	74754	0.943824	0.996335	0.969369		SA224	179762	78971	74754	0.943131	0.996335	0.969003		SA224	179639	88976	74629	0.835731	0.996396	0.909019		SA224	179639	27860	74629	0.811235	0.302845	0.441042
SA225	147384	66496	63944	0.955441	0.993573	0.974134		SA225	147384	67501	63944	0.941245	0.993604	0.966716		SA225	147387	73277	63945	0.867366	0.993948	0.926353		SA225	147387	42765	63945	0.862691	0.576949	0.691463
SA227	180268	95360	71817	0.749969	0.995823	0.855584		SA227	180268	95451	71817	0.749254	0.995823	0.855119		SA227	177904	110211	69606	0.629447	0.996638	0.771584		SA227	177904	26573	69606	0.776314	0.296368	0.428971
SA231	172982	74050	70468	0.949804	0.998084	0.973346		SA231	172982	74037	70468	0.949971	0.998084	0.973433		SA231	172972	77928	70458	0.902436	0.998112	0.947866		SA231	172972	48385	70458	0.849519	0.583383	0.691736
SA232	225361	125131	125636	0.880597	0.877058	0.878824		SA232	225361	125014	125636	0.881581	0.877217	0.879394		SA232	225361	128247	125636	0.851864	0.869568	0.860625		SA232	225361	1408	125636	0.808239	0.00905791	0.0179151
SA233	163976	9549	70723	0.846162	0.114249	0.201316		SA233	163976	7244	70723	0.810326	0.0829999	0.150577		SA233	163976	8303	70723	0.826448	0.0970264	0.173664		SA233	163976	6617	70723	0.502191	0.0469861	0.0859322
SA235	185177	109727	711	0.00611518	0.943741	0.0121516		SA235	185177	91038	711	0.00745842	0.954993	0.0148013		SA235	185177	117792	711	0.00574742	0.95218	0.0114259		SA235	185177	10284	711	0.0174057	0.251758	0.0325603
SA236	189989	98593	94594	0.958841	0.999376	0.978689		SA236	189989	95695	94594	0.981964	0.993393	0.987645		SA236	82156	54793	45618	0.832041	0.999386	0.908068		SA236	189979	32677	94583	0.842336	0.291014	0.432579
SA237	198975	68980	67463	0.971209	0.993048	0.982007		SA237	198975	68998	67463	0.970956	0.993048	0.981878		SA237	198975	94311	67463	0.710914	0.993834	0.828897		SA237	198975	9258	67463	0.679952	0.0933104	0.164101
SA238	224025	36602	28563	0.762171	0.976683	0.856196		SA238	224025	30388	28563	0.756944	0.805308	0.780377		SA238	224025	41702	28563	0.66757	0.974653	0.7924		SA238	224025	2048	28563	0.837891	0.0600777	0.112117
SA239	226419	112756	111166	0.977403	0.991382	0.984343		SA239	226419	111878	111166	0.983786	0.990087	0.986926		SA239	226419	118621	111166	0.929945	0.992309	0.960115		SA239	226419	1607	111166	0.955196	0.0138082	0.0272228
SA299	204828	107532	112119	0.971581	0.931831	0.951291		SA299	204828	102618	112119	0.964139	0.882437	0.921481		SA299	204828	119054	112119	0.8657	0.919247	0.89167		SA299	204828	6687	112119	0.879318	0.0524443	0.0989849
SA300	201532	106154	95247	0.866392	0.965605	0.913312		SA300	201532	105904	95247	0.865123	0.96192	0.910957		SA300	201532	113223	95247	0.812538	0.965889	0.882602		SA300	201532	2743	95247	0.864382	0.0248932	0.0483927

## Sheet: B) Performance_LOH_signif
Performance Comparison Significance and Summary for 23 cases
Pairwise model Wilcoxon one tail tests	Precision	Recall	F-Measure
APOLLOH_vs_APOLLOH-noS	0.213709	0.0233948	0.0557129
APOLLOH_vs_APOLLOH-noCN	1.19209e-07	0.984418	3.57628e-07
APOLLOH_vs_SNVMIX	8.34465e-06	1.19209e-07	2.38419e-07
APOLLOH-noS_vs_APOLLOH-noCN	1.66893e-06	0.995727	0.000237584
APOLLOH-noCN_vs_SNVMIX	0.311034	1.19209e-07	2.38419e-07
Performance Distributions	SNVMix_Precision	APOLLOH-noCN_Precision	APOLLOH-noS_Precision	APOLLOH_Precision	SNVMix_Recall	APOLLOH-noCN_Recall	APOLLOH-noS_Recall	APOLLOH_Recall	SNVMix_F-Measure	APOLLOH-noCN_F-Measure	APOLLOH-noS_F-Measure	APOLLOH_F-Measure
lower_whisker	0.292885	0.502823	0.749254	0.681354	0.00905791	0.790093	0.791694	0.792561	0.0179151	0.539281	0.580661	0.658191
lower_hinge	0.623905	0.689242	0.817969	0.833919	0.0548112	0.894407	0.84522	0.879657	0.090805	0.740764	0.793721	0.831927
median	0.776314	0.826448	0.941245	0.943824	0.0933104	0.980908	0.970565	0.974968	0.1621	0.830192	0.9161	0.913239
upper_hinge	0.856105	0.866544	0.969011	0.959288	0.399959	0.996189	0.993498	0.996079	0.487492	0.923386	0.972253	0.97374
upper_whisker	0.955196	0.943313	0.988771	0.986848	0.593196	0.999709	0.999709	0.999709	0.691736	0.970693	0.99137	0.991977
IQR	0.2322	0.177302	0.151042	0.125369	0.345148	0.101782	0.148278	0.116422	0.396687	0.182622	0.178531	0.141813
mean	0.707613	0.733308	0.833975	0.846721	0.227067	0.902531	0.881591	0.901263	0.283752	0.766417	0.815808	0.836713

## Sheet: C) Performance_ASCNA
APOLLOH-noCN								APOLLOH
Sample	Number_Posn	Pos_Predictions	SNP6_ASCNA_Predictions	Precision	Recall	F_Measure		Sample	Number_Posn	Pos_Predictions	SNP6_ASCNA_Predictions	Precision	Recall	F_Measure
SA028	103833	2086	9945	0.944871	0.19819	0.327654		SA028	103833	10079	9945	0.985514	0.998793	0.992109
SA029	62041	18	103	0	0	NaN		SA029	62041	18	103	0	0	NaN
SA030	53535	1239	20454	0.82163	0.0497702	0.0938552		SA030	53535	14474	20454	0.984662	0.696783	0.816079
SA052	76566	12278	13110	0.000570125	0.000533944	0.000551442		SA052	76566	20954	13110	0.551541	0.881541	0.678546
SA065	86405	3372	9277	0.960558	0.349143	0.512135		SA065	86405	9384	9277	0.976769	0.988035	0.98237
SA073	30327	3812	9305	0.00786988	0.00322407	0.00457422		SA073	30327	6400	9305	0.404844	0.278452	0.329959
SA219	93197	17034	21089	0.111424	0.0899995	0.0995724		SA219	93197	25690	21089	0.41775	0.508891	0.458838
SA220	35869	489	18373	0.112474	0.00299352	0.00583183		SA220	35869	17597	18373	0.972154	0.931095	0.951182
SA221	5342	3390	2619	0.716224	0.927071	0.808121		SA221	5342	2492	2619	0.685393	0.652157	0.668362
SA223	53167	878	9274	0.0455581	0.00431313	0.00788022		SA223	53167	8356	9274	0.805888	0.726116	0.763925
SA224	83215	533	8461	0.49531	0.031202	0.0587058		SA224	83215	6884	8461	0.960198	0.781232	0.861518
SA225	70591	1006	6647	0.615308	0.0931247	0.161767		SA225	70591	7025	6647	0.941922	0.995487	0.967964
SA227	100383	1946	28566	0.85149	0.058006	0.108613		SA227	100383	10820	28566	0.972274	0.36827	0.5342
SA231	73566	363	3098	0.633609	0.0742414	0.13291		SA231	73566	3162	3098	0.957306	0.977082	0.967093
SA232	141822	17355	16186	0.0557764	0.0598048	0.0577204		SA232	141822	18189	16186	0.150805	0.169467	0.159593
SA233	72976	65922	2253	0.0312642	0.91478	0.060462		SA233	72976	64664	2253	0.031857	0.914336	0.0615688
SA235	25649	43	24938	0.209302	0.000360895	0.000720548		SA235	25649	74	24938	0.459459	0.00136338	0.0027187
SA236	107215	1542	12621	0.961738	0.117503	0.209419		SA236	107215	12506	12621	0.995282	0.986213	0.990727
SA237	75043	600	7580	0.306667	0.0242744	0.0449878		SA237	75043	8007	7580	0.941426	0.994459	0.967216
SA238	41138	3239	12575	0.776474	0.2	0.318073		SA238	41138	5872	12575	0.88658	0.413996	0.564428
SA239	117548	909	6382	0.0594059	0.0084613	0.0148128		SA239	117548	5331	6382	0.820296	0.685208	0.746692
SA299	128186	13908	16067	0.349008	0.30211	0.32387		SA299	128186	21163	16067	0.638851	0.841476	0.726296
SA300	114553	5514	19306	0.410773	0.117321	0.182514		SA300	114553	10398	19306	0.684939	0.368901	0.479531
Total	1752167	157476	278229					Total	1752167	289539	278229
Median	75043	1946	9945	0.349008	0.0598048	0.0967138		Median	75043	9384	9945	0.820296	0.726116	0.736494

## Sheet: D) Performance_vs_EXCAP
				APOLLOH Performance using EXCAP data as ground truth			APOLLOH Performance using SNP6 data as ground truth			Depth Comparison
Sample	Number of overlapping positions between WGSS and EXCAP	Number of LOH positions predicted in WGSS	Number of LOH positions predicted in EXCAP	Precision	Recall	F_Measure	Precision	Recall	F_Measure	Average WGSS Depth	Average EXCAP Depth	Depth Ratio (EXCAP:WGSS)
SA029	25045	9575	9390	0.956971	0.975825	0.966306	0.982842	0.999709	0.991204	19.5582	33.4858	1.71211
SA030	29960	9799	9663	0.782733	0.793749	0.788203	0.681354	0.993289	0.80827	27.1068	38.6016	1.42406
SA052	26803	9506	8358	0.852093	0.969131	0.906852	0.959735	0.851913	0.902616	25.9093	54.2576	2.09414
SA065	30262	17499	17916	0.977656	0.954901	0.966144	0.986848	0.997161	0.991977	31.4012	33.717	1.07375
SA073	29416	7645	6124	0.718901	0.897453	0.798315	0.550253	0.818809	0.658191	26.2623	63.4674	2.41667
Median				0.852093	0.954901	0.906852	0.959735	0.993289	0.902616	26.2623	38.6016	1.71211
