# Supplementary material for: Integrative analysis of genome-wide loss of heterozygosity and monoallelic expression at nucleotide resolution reveals disrupted pathways in triple-negative breast cancer
Source: HighWire-hosted journal article supplement (doi:10.1101/gr.137570.112), 2012-05-25
Supplement: table_S5.xlsx [file table_S5.xlsx]

## Sheet: WholeGenome
Sample	Mixture Proportions		Adjusted Theoretical Proportions (85% cellularity)		Inferred Stromal Proportion (30X sampling)			Inferred Stromal Proportion (60X sampling)
					APOLLOH (Uniform priors)		APOLLOH-noS	APOLLOH (Uniform priors)		APOLLOH-noS
	Tumour	Normal	Tumour	Normal	Estimated Stromal Proportion	F_Measure	F_Measure	Estimated Stromal Proportion	F_Measure	F_Measure
Tum10Norm90	0.1	0.9	0.085	0.915	0.6096	0.0255386	0.0268579	0.709774	0.706209	0.703553
Tum20Norm80	0.2	0.8	0.17	0.83	0.6251	0.0857725	0.0396141	0.713089	0.71584	0.716956
Tum30Norm70	0.3	0.7	0.255	0.745	0.6908	0.380905	0.260484	0.667541	0.74683	0.736134
Tum40Norm60	0.4	0.6	0.34	0.66	0.6128	0.751826	0.701535	0.588532	0.80034	0.780238
Tum50Norm50	0.5	0.5	0.425	0.575	0.5353	0.94035	0.910639	0.513559	0.879332	0.854246
Tum60Norm40	0.6	0.4	0.51	0.49	0.4574	0.973131	0.945979	0.439309	0.91623	0.916273
Tum70Norm30	0.7	0.3	0.595	0.405	0.3818	0.975722	0.960405	0.364266	0.956968	0.93276
Tum80Norm20	0.8	0.2	0.68	0.32	0.3074	0.975842	0.959709	0.284875	0.963884	0.939937
Tum90Norm10	0.9	0.1	0.765	0.235	0.2389	0.974003	0.95582	0.212063	0.967926	0.943567
Tum100 (42X)	1	0	0.85	0.15	0.138208	0.974134	0.966716	0.138208	0.974134	0.966716

## Sheet: Chr18
Sample	Mixture Proportions		Adjusted Theoretical Proportions (85% cellularity)		Inferred Stromal Proportion
	Tumour	Normal	Tumour	Normal	3-tiered	Informed	Uniform
Tum10Norm90	0.1	0.9	0.085	0.915	0.8513	0.8661	0.5861
Tum20Norm80	0.2	0.8	0.17	0.83	0.8351	0.8065	0.5762
Tum30Norm70	0.3	0.7	0.255	0.745	0.7908	0.7227	0.7081
Tum40Norm60	0.4	0.6	0.34	0.66	0.7105	0.661	0.7105
Tum50Norm50	0.5	0.5	0.425	0.575	0.6607	0.5529	0.6607
Tum60Norm40	0.6	0.4	0.51	0.49	0.6059	0.4532	0.6059
Tum70Norm30	0.7	0.3	0.595	0.405	0.4371	0.3384	0.5406
Tum80Norm20	0.8	0.2	0.68	0.32	0.3636	0.2449	0.4378
Tum90Norm10	0.9	0.1	0.765	0.235	0.2971	0.1292	0.3387
