# Supplementary material for: Integrative analysis of genome-wide loss of heterozygosity and monoallelic expression at nucleotide resolution reveals disrupted pathways in triple-negative breast cancer
Source: HighWire-hosted journal article supplement (doi:10.1101/gr.137570.112), 2012-05-25
Supplement: table_S6.xlsx [file table_S6.xlsx]

## Sheet: A) Number Segments
A) Number of APOLLOH Segments
Sample	HOMD	DLOH	NLOH	ALOH	HET	BCNA	ASCNA
SA028	468	433	802	677	902	399	197
SA029	0	467	676	95	223	3	1
SA030	22	234	614	449	743	67	45
SA052	4	124	237	249	233	16	61
SA065	150	1257	1289	638	907	336	250
SA073	2	367	777	378	534	223	62
SA219	3	353	727	411	612	110	34
SA220	1	188	428	114	496	150	102
SA221	17	566	726	388	690	95	18
SA223	11	566	1139	507	1534	290	83
SA224	101	431	749	503	860	348	250
SA225	40	385	1463	479	1382	186	265
SA227	22	764	1229	793	822	210	247
SA231	220	603	716	883	1196	183	283
SA232	0	771	898	414	471	77	65
SA233	2	0	273	198	227	8	1
SA235	0	1	307	486	410	155	98
SA236	44	463	941	668	974	259	207
SA237	17	173	927	239	1006	48	92
SA238	0	161	767	310	767	36	34
SA239	9	222	635	109	537	20	14
SA299	2	596	827	408	324	117	58
SA300	11	322	728	486	488	124	101
Total	1146	9447	17875	9882	16338	3460	2568
Median	11	385	749	414	690	124	83
Mean	49.8261	410.739	777.174	429.652	710.348	150.435	111.652

## Sheet: B) Proportion Genome Altered
B) Proportion of Genome Altered
Sample	HOMD	DLOH	NLOH	ALOH	Total_LOH	HET	BCNA	ASCNA
SA028	0.09859	0.0138698	0.439909	0.106317	0.560097	0.275135	0.0941706	0.066178
SA029	0	0.375093	0.063524	0.00230848	0.440926	0.558996	7.12303e-06	7.77527e-05
SA030	0.0110916	0.190768	0.105813	0.0663792	0.362961	0.603894	0.00393857	0.0220537
SA052	1.2484e-05	0.283613	0.0579511	0.0614508	0.403015	0.544769	8.02706e-05	0.0522031
SA065	0.0752625	0.357579	0.0999857	0.133189	0.590753	0.276099	0.0432536	0.0578857
SA073	2.76628e-05	0.0896636	0.131746	0.026875	0.248285	0.718207	0.0161816	0.0334805
SA219	6.67276e-05	0.139123	0.175592	0.102692	0.417407	0.566431	0.00843139	0.0160954
SA220	3.78827e-06	0.11189	0.128364	0.00729541	0.247549	0.692063	0.0255932	0.060384
SA221	0.00142666	0.375453	0.0960477	0.0496542	0.521154	0.473608	0.036898	0.00381042
SA223	0.000533992	0.249598	0.0902649	0.0395197	0.379383	0.58967	0.0299736	0.0304125
SA224	0.0755208	0.237498	0.120074	0.0862444	0.443817	0.407152	0.0261116	0.0735101
SA225	0.00183591	0.385191	0.118344	0.0480328	0.551568	0.370375	0.0190654	0.0762208
SA227	0.00380298	0.239378	0.283997	0.104798	0.628173	0.288836	0.0315113	0.0791881
SA231	0.0285022	0.349059	0.0605596	0.0780519	0.48767	0.389414	0.00712298	0.0944136
SA232	0	0.357624	0.178778	0.048693	0.585094	0.39766	0.0125759	0.0172456
SA233	8.19184e-05	0	0.0947302	0.0365645	0.131295	0.868536	0.000305781	8.77606e-05
SA235	0	4.34546e-06	0.511204	0.153853	0.665062	0.307237	0.0205159	0.0277014
SA236	0.0250828	0.34449	0.110525	0.11957	0.574584	0.362787	0.0277689	0.0375457
SA237	0.00132816	0.252745	0.156086	0.0247808	0.433612	0.539089	0.000404508	0.0259707
SA238	0	0.0669016	0.0956355	0.0459886	0.208526	0.770068	0.00430992	0.0214068
SA239	0.00112891	0.395387	0.0922076	0.0120498	0.499644	0.483385	0.000662744	0.0158426
SA299	2.10552e-05	0.244183	0.239597	0.097096	0.580877	0.38822	0.0240679	0.0308825
SA300	0.000648633	0.288634	0.13103	0.104468	0.524133	0.444477	0.0161302	0.0307409
Median	0.000648633	0.249598	0.118344	0.0614508	0.48767	0.473608	0.0161816	0.0307409
Mean	0.0141291	0.232511	0.155738	0.0676466	0.455895	0.492005	0.0195253	0.0379712

## Sheet: C) Number Genes
C) Number of Genes
Sample	numDLOHgene	numNLOHgene	numALOHgene	numLOHgene	numHETgene	numBCNAgene	numASCNAgene
SA028	232	6468	1790	8490	3344	1022	1116
SA029	4859	740	41	5640	9600	1	0
SA030	2819	1782	905	5506	9627	115	514
SA052	4431	542	1147	6120	8714	0	1282
SA065	6228	1387	1476	9091	3826	434	677
SA073	1137	2349	595	4081	10458	294	706
SA219	2242	2429	1819	6490	8800	103	378
SA220	905	1681	83	2669	9822	385	1001
SA221	6285	1585	1321	9191	7050	405	74
SA223	3301	808	675	4784	9454	436	413
SA224	3293	2083	1565	6941	6457	379	935
SA225	5144	1816	634	7594	5553	178	1224
SA227	2540	4889	1650	9079	4375	326	1312
SA231	5004	731	1005	6740	5966	125	1246
SA232	6020	2718	942	9680	6288	209	369
SA233	0	1191	503	1694	13774	3	3
SA235	0	8218	2228	10446	4938	252	401
SA236	4974	1583	1543	8100	6387	506	519
SA237	4172	1993	229	6394	9329	13	223
SA238	793	1857	663	3313	13085	56	328
SA239	6378	1703	212	8293	8495	25	167
SA299	3123	4622	1582	9327	5785	395	592
SA300	4408	2167	2049	8624	6951	316	380
Total	78288	55342	24657	158287	178078	5978	13860
Median	3301	1816	1005	6941	7050	252	514
Mean	3403.83	2406.17	1072.04	6882.04	7742.52	259.913	602.609

## Sheet: D) Proportion Amplified Genes
D) Proportion of Genes within Amplified Regions
Sample	Total Amplified genes	ALOH %	BCNA %	ASCNA %
SA028	3928	0.455703	0.260183	0.284114
SA029	42	0.97619	0.0238095	0
SA030	1534	0.589961	0.0749674	0.335072
SA052	2429	0.472211	0	0.527789
SA065	2587	0.570545	0.167762	0.261693
SA073	1595	0.373041	0.184326	0.442633
SA219	2300	0.79087	0.0447826	0.164348
SA220	1469	0.056501	0.262083	0.681416
SA221	1800	0.733889	0.225	0.0411111
SA223	1524	0.442913	0.286089	0.270997
SA224	2879	0.543592	0.131643	0.324766
SA225	2036	0.311395	0.0874263	0.601179
SA227	3288	0.501825	0.0991484	0.399027
SA231	2376	0.42298	0.0526094	0.524411
SA232	1520	0.619737	0.1375	0.242763
SA233	509	0.988212	0.00589391	0.00589391
SA235	2881	0.773343	0.0874696	0.139188
SA236	2568	0.600857	0.19704	0.202103
SA237	465	0.492473	0.027957	0.47957
SA238	1047	0.633238	0.0534862	0.313276
SA239	404	0.524752	0.0618812	0.413366
SA299	2569	0.615804	0.153756	0.23044
SA300	2745	0.746448	0.115118	0.138434
Total	44495
Median	2036	0.570545	0.0991484	0.284114
Mean	1934.57	0.575499	0.119128	0.305373

## Sheet: E) Number & % of MAE genes
Number of monoallelic expressed genes established by LOH										Proportion of Monoallelic gene expression established by LOH
Sample	numDLOHgene	numNLOHgene	numALOHgene	numLOHgene	numBCNAgene	numASCNAgene	numHETgene	Total		numDLOHgene	numNLOHgene	numALOHgene	numLOHgene	numBCNAgene	numASCNAgene	numHETgene
SA028	22	1410	405	1837	58	132	202	2229		0.01	0.63	0.18	0.82	0.03	0.06	0.09
SA029	1606	234	14	1854	0	0	1817	3671		0.44	0.06	0	0.51	0	0	0.49
SA030	824	361	279	1464	15	118	986	2583		0.32	0.14	0.11	0.57	0.01	0.05	0.38
SA052	679	81	327	1087	0	254	790	2131		0.32	0.04	0.15	0.51	0	0.12	0.37
SA065	1935	560	510	3005	40	109	321	3475		0.56	0.16	0.15	0.86	0.01	0.03	0.09
SA073	312	685	269	1266	53	190	1760	3269		0.1	0.21	0.08	0.39	0.02	0.06	0.54
SA219	701	923	735	2359	20	79	1532	3990		0.18	0.23	0.18	0.59	0.01	0.02	0.38
SA220	155	541	34	730	34	139	688	1591		0.1	0.34	0.02	0.46	0.02	0.09	0.43
SA221	2596	765	513	3874	88	24	1551	5537		0.47	0.14	0.09	0.7	0.02	0	0.28
SA223	897	170	157	1224	57	70	769	2120		0.42	0.08	0.07	0.58	0.03	0.03	0.36
SA224	921	644	594	2159	53	128	450	2790		0.33	0.23	0.21	0.77	0.02	0.05	0.16
SA225	1448	671	354	2473	13	136	312	2934		0.49	0.23	0.12	0.84	0	0.05	0.11
SA227	554	1310	630	2494	35	165	408	3102		0.18	0.42	0.2	0.8	0.01	0.05	0.13
SA231	981	145	330	1456	8	76	269	1809		0.54	0.08	0.18	0.8	0	0.04	0.15
SA232	1956	970	416	3342	40	124	1322	4828		0.41	0.2	0.09	0.69	0.01	0.03	0.27
SA233	0	279	132	411	0	0	3197	3608		0	0.08	0.04	0.11	0	0	0.89
SA235	0	2385	746	3131	45	90	740	4006		0	0.6	0.19	0.78	0.01	0.02	0.18
SA236	1388	476	645	2509	29	72	398	3008		0.46	0.16	0.21	0.83	0.01	0.02	0.13
SA237	1028	501	76	1605	2	26	942	2575		0.4	0.19	0.03	0.62	0	0.01	0.37
SA238	202	303	167	672	3	65	1265	2005		0.1	0.15	0.08	0.34	0	0.03	0.63
SA239	2225	622	104	2951	2	56	1504	4513		0.49	0.14	0.02	0.65	0	0.01	0.33
SA299	744	1286	438	2468	40	101	620	3229		0.23	0.4	0.14	0.76	0.01	0.03	0.19
Total	21174	15322	7875	44371	635	2154	21843	69003
Median	860.5	591	342	2006.5	31.5	95.5	779.5	3055		0.32	0.18	0.11	0.67	0.01	0.03	0.31
Mean	962.455	696.455	357.955	2016.86	28.8636	97.9091	992.864	3136.5		0.3	0.22	0.12	0.64	0.01	0.04	0.32
