# Supplementary material for: Integrative analysis of genome-wide loss of heterozygosity and monoallelic expression at nucleotide resolution reveals disrupted pathways in triple-negative breast cancer
Source: HighWire-hosted journal article supplement (doi:10.1101/gr.137570.112), 2012-05-25
Supplement: table_S10.xlsx [file table_S10.xlsx]

## Sheet: Sheet1
Sample	Number of germline heterozygous positions in normal genome	Number of positions - filtered out <10 & >200 depth in tumour genome
SA028	1430768	1306357
SA029	1526086	1247164
SA030	1374952	1233202
SA052	1458758	1272070
SA065	990665	882808
SA073	1461264	1288330
SA085	1590094	941194
SA095	2051684	2036602
SA219	1554744	1346094
SA220	1411483	803756
SA221	2122090	2111444
SA223	1484438	1226968
SA224	1511440	1253235
SA225	1184531	911873
SA227	1353501	1176559
SA231	1457893	1111174
SA232	2171144	2153541
SA233	1443496	1030503
SA235	1476631	1217066
SA236	1517693	1324131
SA237	1527295	1397236
SA238	2136320	2121139
SA239	2151339	2141085
SA299	2101476	2073854
SA300	1955450	1944006
